# Supplementary material for: Tissue-resident natural killer cells support survival in pancreatic cancer through promotion of cDC1-CD8 T activity
Source: eLife. 2024 Dec 10;13:RP92672. doi: 10.7554/eLife.92672 (PMC11630822; doi:10.7554/eLife.92672)
Supplement: Figure 6—source data 1. [file elife-92672-fig6-data1.xlsx]

## Sheet: NK_C1 vs ALL Signature
NK_C1 vs ALL Signature
Genes
GZMA
TNFRSF18
CD7
CD247
CTSW
HOPX
IL2RB
AC092580.4
TMIGD2
KLRB1
NKG7
CD96
PTPN22
LCK

## Sheet: cDC1 vs ALL Signature
cDC1 vs ALL Signature
Genes
IDO1
DNASE1L3
CLEC9A
CLNK
ASB2
FLT3
P2RY14
HLA-DOB
SERPINF2
XCR1
ENPP1
CCSER1
ZNF366
GCSAM
TLR10
BTLA
P2RY6
PPM1J
MCOLN2
